# Supplementary material
Source: Springer Nature journal article supplement (https://www.springermedizin.de/resource/supplementary/13075_2013_4223_MOESM2_ESM.pdf/9696366)
Supplement: MOESM2 [file 9696366]

**Additional Table T1.** AUC values with corresponding 95% confidence intervals, P values and standard errors for serum cell free nucleosomes and the 3 different parameters, which were analyzed individually by logistic regression.

| <b>Parameter</b>             | <b>Sample</b> | <b>AUC</b> | <b>95% CI</b> | <b>S.E.</b> | <b>P value</b> |
|------------------------------|---------------|------------|---------------|-------------|----------------|
| <b>Cell-free nucleosomes</b> | Serum         | 0.97       | 0.94 to 1.00  | 0.016       | < 0.0001       |
|                              | Plasma        | 0.57       | 0.43 to 0.71  | 0.072       | 0.31           |
| <b>Cell-free DNA (GAPDH)</b> | Serum         | 0.83       | 0.70 to 0.97  | 0.067       | 0.000          |
|                              | Plasma        | 0.67       | 0.48 to 0.85  | 0.095       | 0.10           |
| <b>Myeloperoxidase</b>       | Serum         | 0.77       | 0.61 to 0.93  | 0.081       | 0.007          |
|                              | Plasma        | 0.58       | 0.38 to 0.77  | 0.099       | 0.44           |
| <b>Neutrophil elastase</b>   | Serum         | 0.74       | 0.57 to 0.90  | 0.084       | 0.017          |
|                              | Plasma        | 0.61       | 0.42 to 0.79  | 0.097       | 0.29           |

AUC: Area under the curve; 95% CI: 95% confidence interval; S.E.: standard error; GAPDH: Glyceraldehyde 3-phosphate dehydrogenase.
